# Supplementary material for: Evaluation of genetic diversity among strains of the human gut commensal Bifidobacterium adolescentis
Source: PubMed Central journal article supplement (PMC4817515; doi:10.1038/srep23971), 2016-04-01
Supplement: srep23971-s1.pdf [file srep23971-s1.pdf]

**Evaluation of genetic diversity among strains of the human gut commensal**

*Bifidobacterium adolescentis*

Sabrina Duranti<sup>1</sup>, Christian Milani<sup>1</sup>, Gabriele Andrea Lugli<sup>1</sup>, Leonardo Mancabelli<sup>1</sup>, Francesca Turrone<sup>1</sup>, Chiara Ferrario<sup>1</sup>, Marta Mangifesta<sup>2</sup>, Alice Viappiani<sup>2</sup>, Borja Sánchez<sup>3¶</sup>, Abelardo Margolles<sup>3</sup>, Douwe van Sinderen<sup>4</sup> and Marco Ventura<sup>1</sup>

**Supplementary information**

**Fig. S1.** Functional assignment of the analyzed *B. adolescentis* genomes based on eggNOG database. Each letter stands for the following function: **J**, Translation, ribosomal structure and biogenesis, **A**, RNA processing and modification, **K**, Transcription, **L**, Replication, recombination and repair, **D**, Cell cycle control, cell division, chromosome partitioning, **V**, Defense mechanism, **T**, Signal transduction mechanisms, **M**, Cell wall/membrane/envelope biogenesis, **O**, Posttranslational modification, protein turnover, chaperones, **C**, Energy production and conversion, **G**, Carbohydrate transport and metabolism, **E**, Amino acid transport and metabolism, **F**, Nucleotide transport and metabolism, **H**, Coenzyme transport and metabolism, **I**, Lipid transport and metabolism, **P**, Inorganic ion transport and metabolism, **Q**, Secondary metabolites biosynthesis, transport and catabolism, **R**, General function prediction only, **S**, Function unknown.

**Fig. S2.** Functional classification of the genes that do not belong to the *B. adolescentis* core-genome based on eggNOG database. Each letter stands for the following function: **J**, Translation, ribosomal structure and biogenesis, **A**, RNA processing and modification, **K**, Transcription, **L**, Replication, recombination and repair, **D**, Cell cycle control, cell division, chromosome partitioning, **V**, Defense mechanism, **T**, Signal transduction mechanisms, **M**, Cell wall/membrane/envelope biogenesis, **O**, Posttranslational modification, protein turnover, chaperones, **C**, Energy production and conversion, **G**, Carbohydrate transport and metabolism, **E**, Amino acid transport and metabolism, **F**, Nucleotide transport and metabolism, **H**, Coenzyme transport and metabolism, **I**, Lipid transport and metabolism, **P**, Inorganic ion transport and metabolism, **Q**, Secondary metabolites biosynthesis, transport and catabolism, **R**, General function prediction only, **S**, Function unknown.

**Fig. S3.** Mobile genetic elements of the analyzed *B. adolescentis* genomes. From inner to outer circle: the approximate genome sizes, percentage of genes acquired by horizontal gene transfer, number of unique genes, number of complete pilus type Iva loci, number of complete EPS cluster, number of R/M systems and number of CRISPR loci.

**Fig. S4.** Prediction of glycosyl hydrolases (GH), glycosyl transferases (GT) and carbohydrate esterases (CE) in *B. adolescentis* genomes. Panels a, b and c show, respectively, the GH and GT and

CE families profile of all analysed *B. adolescentis* genomes, based on the CAZy database. The color represents the numbers of genes identify for each GH, GT or CE families.

**Table S1** Average nucleotide identity (ANI) alignment of *B. adolescentis* strain.

**Table S2** Percentage of genes putatively involved in HGT events.

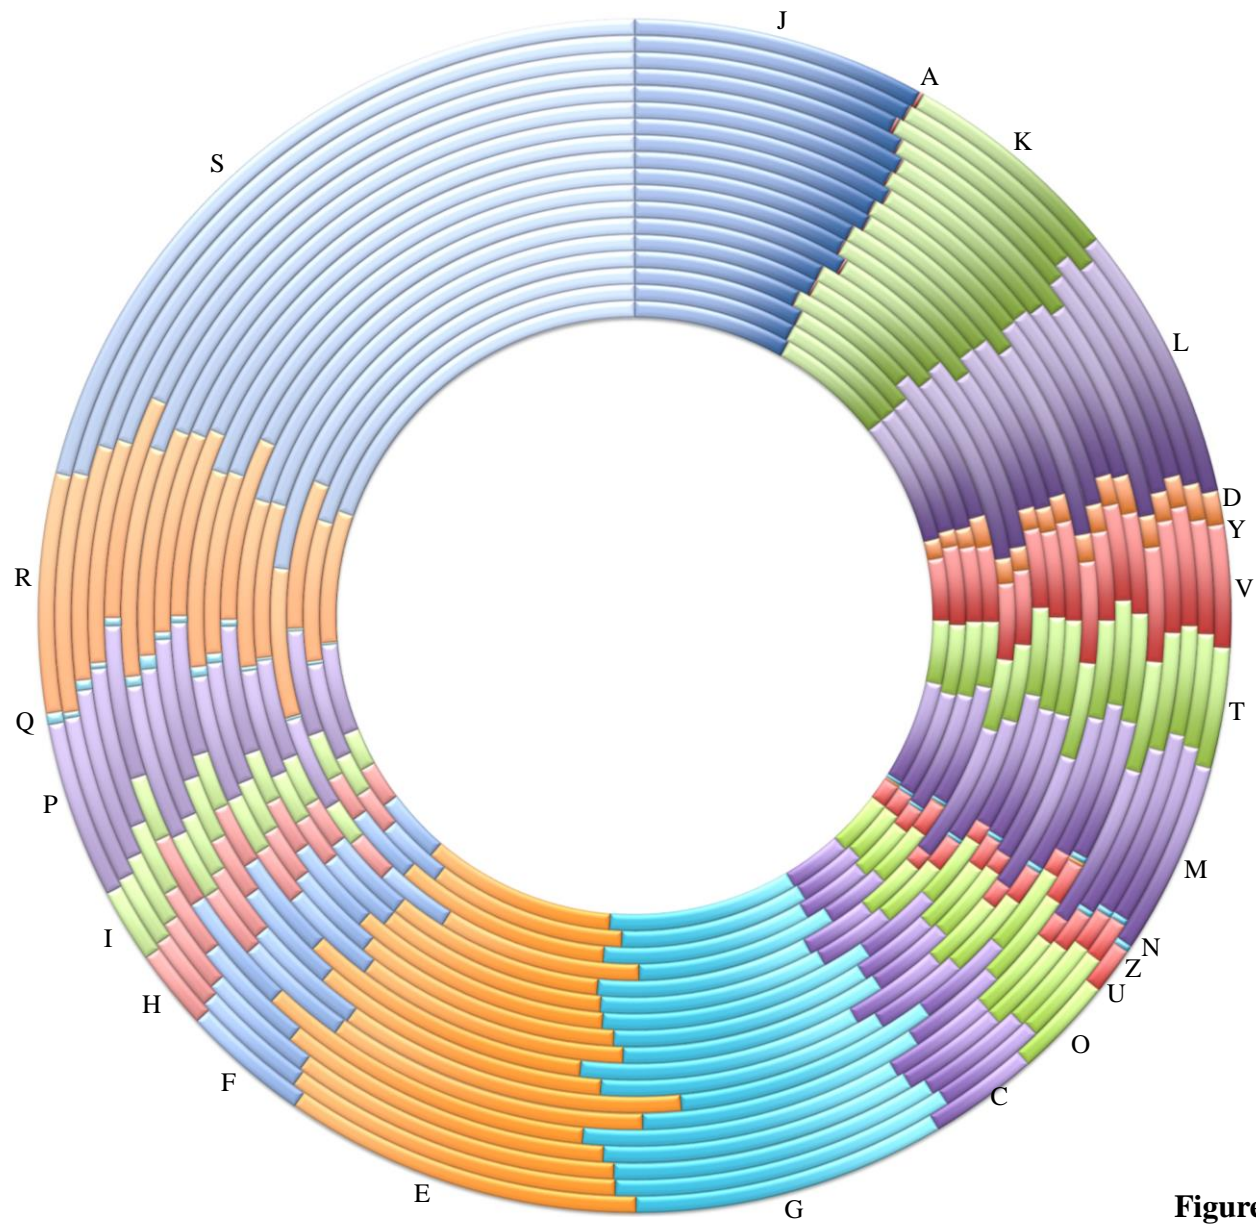

**Figure S1**

|   | <i>B. adolescentis</i> 150 | <i>B. adolescentis</i> 22L | <i>B. adolescentis</i> 42B | <i>B. adolescentis</i> JCM15918 | <i>B. adolescentis</i> 487B | <i>B. adolescentis</i> 703B | <i>B. adolescentis</i> 70B | <i>B. adolescentis</i> AD2-8 | <i>B. adolescentis</i> AL12-4 | <i>B. adolescentis</i> AL46-2 | <i>B. adolescentis</i> AL46-7 | <i>B. adolescentis</i> ATCC15703 | <i>B. adolescentis</i> BBMN23 | <i>B. adolescentis</i> L2-32 | <i>B. adolescentis</i> LMG10733 | <i>B. adolescentis</i> LMG10734 | <i>B. adolescentis</i> LMG11579 | <i>B. adolescentis</i> LMG18897 |
|---|----------------------------|----------------------------|----------------------------|---------------------------------|-----------------------------|-----------------------------|----------------------------|------------------------------|-------------------------------|-------------------------------|-------------------------------|----------------------------------|-------------------------------|------------------------------|---------------------------------|---------------------------------|---------------------------------|---------------------------------|
| A |                            |                            |                            |                                 |                             |                             |                            |                              |                               |                               |                               |                                  |                               |                              |                                 |                                 |                                 |                                 |
| C | 1.7%                       | 1.8%                       | 2.4%                       | 1.0%                            | 1.1%                        | 1.6%                        | 2.2%                       | 2.0%                         | 1.7%                          | 1.4%                          | 1.0%                          | 2.3%                             | 1.7%                          | 2.1%                         | 3.0%                            | 1.6%                            | 1.3%                            | 1.5%                            |
| D | 1.2%                       | 0.9%                       | 0.5%                       | 1.3%                            | 3.0%                        | 1.6%                        | 0.8%                       | 1.3%                         | 0.7%                          | 0.8%                          | 1.0%                          | 0.7%                             | 0.6%                          | 1.4%                         | 0.7%                            | 0.6%                            | 1.3%                            | 2.1%                            |
| E | 3.4%                       | 3.8%                       | 3.7%                       | 3.6%                            | 3.0%                        | 2.9%                        | 4.9%                       | 3.5%                         | 5.0%                          | 4.6%                          | 4.4%                          | 5.4%                             | 4.0%                          | 3.5%                         | 4.9%                            | 4.4%                            | 8.8%                            | 4.6%                            |
| F | 0.7%                       | 0.9%                       | 0.8%                       | 1.3%                            | 0.6%                        | 2.1%                        | 1.1%                       | 1.3%                         | 1.7%                          | 1.6%                          | 1.6%                          | 2.0%                             | 1.2%                          | 1.2%                         | 1.6%                            | 2.2%                            | 3.0%                            | 1.8%                            |
| G | 11.6%                      | 13.6%                      | 10.7%                      | 7.5%                            | 9.4%                        | 11.3%                       | 12.6%                      | 11.3%                        | 17.8%                         | 11.9%                         | 11.5%                         | 13.8%                            | 11.8%                         | 11.3%                        | 13.8%                           | 13.6%                           | 8.1%                            | 10.7%                           |
| H | 1.0%                       | 0.9%                       | 1.1%                       | 1.3%                            | 0.9%                        | 0.8%                        | 1.1%                       | 0.8%                         | 1.0%                          | 0.8%                          | 0.8%                          | 1.0%                             | 0.9%                          | 1.4%                         | 1.0%                            | 0.9%                            | 2.0%                            | 0.9%                            |
| I | 0.7%                       | 0.7%                       | 0.5%                       | 0.8%                            | 0.4%                        | 1.3%                        | 1.4%                       | 1.0%                         | 1.1%                          | 0.8%                          | 1.0%                          | 0.7%                             | 1.2%                          | 1.4%                         | 0.7%                            | 1.3%                            | 0.7%                            | 0.6%                            |
| J | 0.7%                       | 0.7%                       | 0.5%                       | 0.8%                            | 0.4%                        | 0.8%                        | 0.8%                       | 0.8%                         | 0.7%                          | 0.8%                          | 1.0%                          | 0.7%                             | 0.7%                          | 0.7%                         | 0.7%                            | 0.6%                            | 0.7%                            | 0.6%                            |
| K | 7.4%                       | 5.9%                       | 6.7%                       | 5.1%                            | 5.8%                        | 5.9%                        | 6.0%                       | 5.8%                         | 7.0%                          | 6.2%                          | 6.3%                          | 8.1%                             | 6.3%                          | 6.0%                         | 8.2%                            | 6.0%                            | 4.7%                            | 5.8%                            |
| L | 9.1%                       | 8.6%                       | 5.6%                       | 11.1%                           | 9.6%                        | 12.3%                       | 6.8%                       | 8.8%                         | 4.7%                          | 8.4%                          | 7.3%                          | 9.4%                             | 8.9%                          | 8.5%                         | 9.5%                            | 8.2%                            | 5.7%                            | 5.5%                            |
| M | 7.1%                       | 7.4%                       | 7.7%                       | 6.7%                            | 6.2%                        | 8.6%                        | 9.3%                       | 6.8%                         | 8.7%                          | 7.9%                          | 8.9%                          | 7.0%                             | 6.9%                          | 7.8%                         | 6.9%                            | 7.6%                            | 7.1%                            | 4.9%                            |
| N | 0.7%                       | 0.9%                       | 0.8%                       | 0.8%                            | 0.6%                        | 0.8%                        | 0.8%                       | 0.8%                         | 0.8%                          | 0.8%                          | 0.8%                          | 0.8%                             | 0.9%                          | 0.7%                         | 0.9%                            | 0.9%                            | 0.9%                            | 0.9%                            |
| O | 0.7%                       | 1.2%                       | 0.7%                       | 0.5%                            | 0.9%                        | 0.8%                        | 0.7%                       | 1.3%                         | 0.7%                          | 0.8%                          | 1.3%                          | 0.7%                             | 0.9%                          | 0.9%                         | 0.7%                            | 0.9%                            | 0.7%                            | 1.5%                            |
| P | 3.7%                       | 3.6%                       | 3.7%                       | 3.9%                            | 2.8%                        | 2.7%                        | 4.9%                       | 3.0%                         | 5.4%                          | 3.0%                          | 2.9%                          | 3.4%                             | 3.2%                          | 4.6%                         | 3.3%                            | 3.8%                            | 5.1%                            | 4.0%                            |
| Q | 0.7%                       | 0.7%                       | 0.7%                       | 0.8%                            | 0.7%                        | 0.7%                        | 0.7%                       | 0.7%                         | 0.7%                          | 0.8%                          | 0.8%                          | 0.7%                             | 0.7%                          | 0.7%                         | 0.7%                            | 0.6%                            | 1.0%                            | 0.9%                            |
| R | 6.7%                       | 7.1%                       | 7.7%                       | 5.9%                            | 6.6%                        | 5.4%                        | 7.4%                       | 7.8%                         | 8.7%                          | 7.3%                          | 8.6%                          | 7.0%                             | 6.3%                          | 6.9%                         | 6.2%                            | 7.6%                            | 9.4%                            | 8.9%                            |
| S | 35.2%                      | 33.7%                      | 35.2%                      | 37.5%                           | 39.9%                       | 33.2%                       | 29.2%                      | 35.5%                        | 26.8%                         | 31.7%                         | 32.1%                         | 28.2%                            | 34.3%                         | 32.7%                        | 28.9%                           | 30.6%                           | 30.6%                           | 34.3%                           |
| T | 2.2%                       | 2.4%                       | 3.2%                       | 2.6%                            | 1.5%                        | 1.9%                        | 3.3%                       | 2.3%                         | 3.0%                          | 3.5%                          | 2.9%                          | 2.7%                             | 3.5%                          | 2.1%                         | 2.6%                            | 2.5%                            | 2.4%                            | 3.1%                            |
| U | 1.2%                       | 1.2%                       | 1.1%                       | 1.5%                            | 1.9%                        | 1.1%                        | 1.1%                       | 1.0%                         | 1.1%                          | 1.4%                          | 1.1%                          | 1.1%                             | 1.2%                          | 0.9%                         | 1.1%                            | 1.3%                            | 2.4%                            | 1.8%                            |
| V | 5.2%                       | 5.6%                       | 7.7%                       | 6.2%                            | 5.5%                        | 6.4%                        | 6.6%                       | 4.8%                         | 5.4%                          | 5.4%                          | 6.5%                          | 7.4%                             | 5.8%                          | 5.8%                         | 7.5%                            | 4.7%                            | 5.4%                            | 5.5%                            |

Figure S2

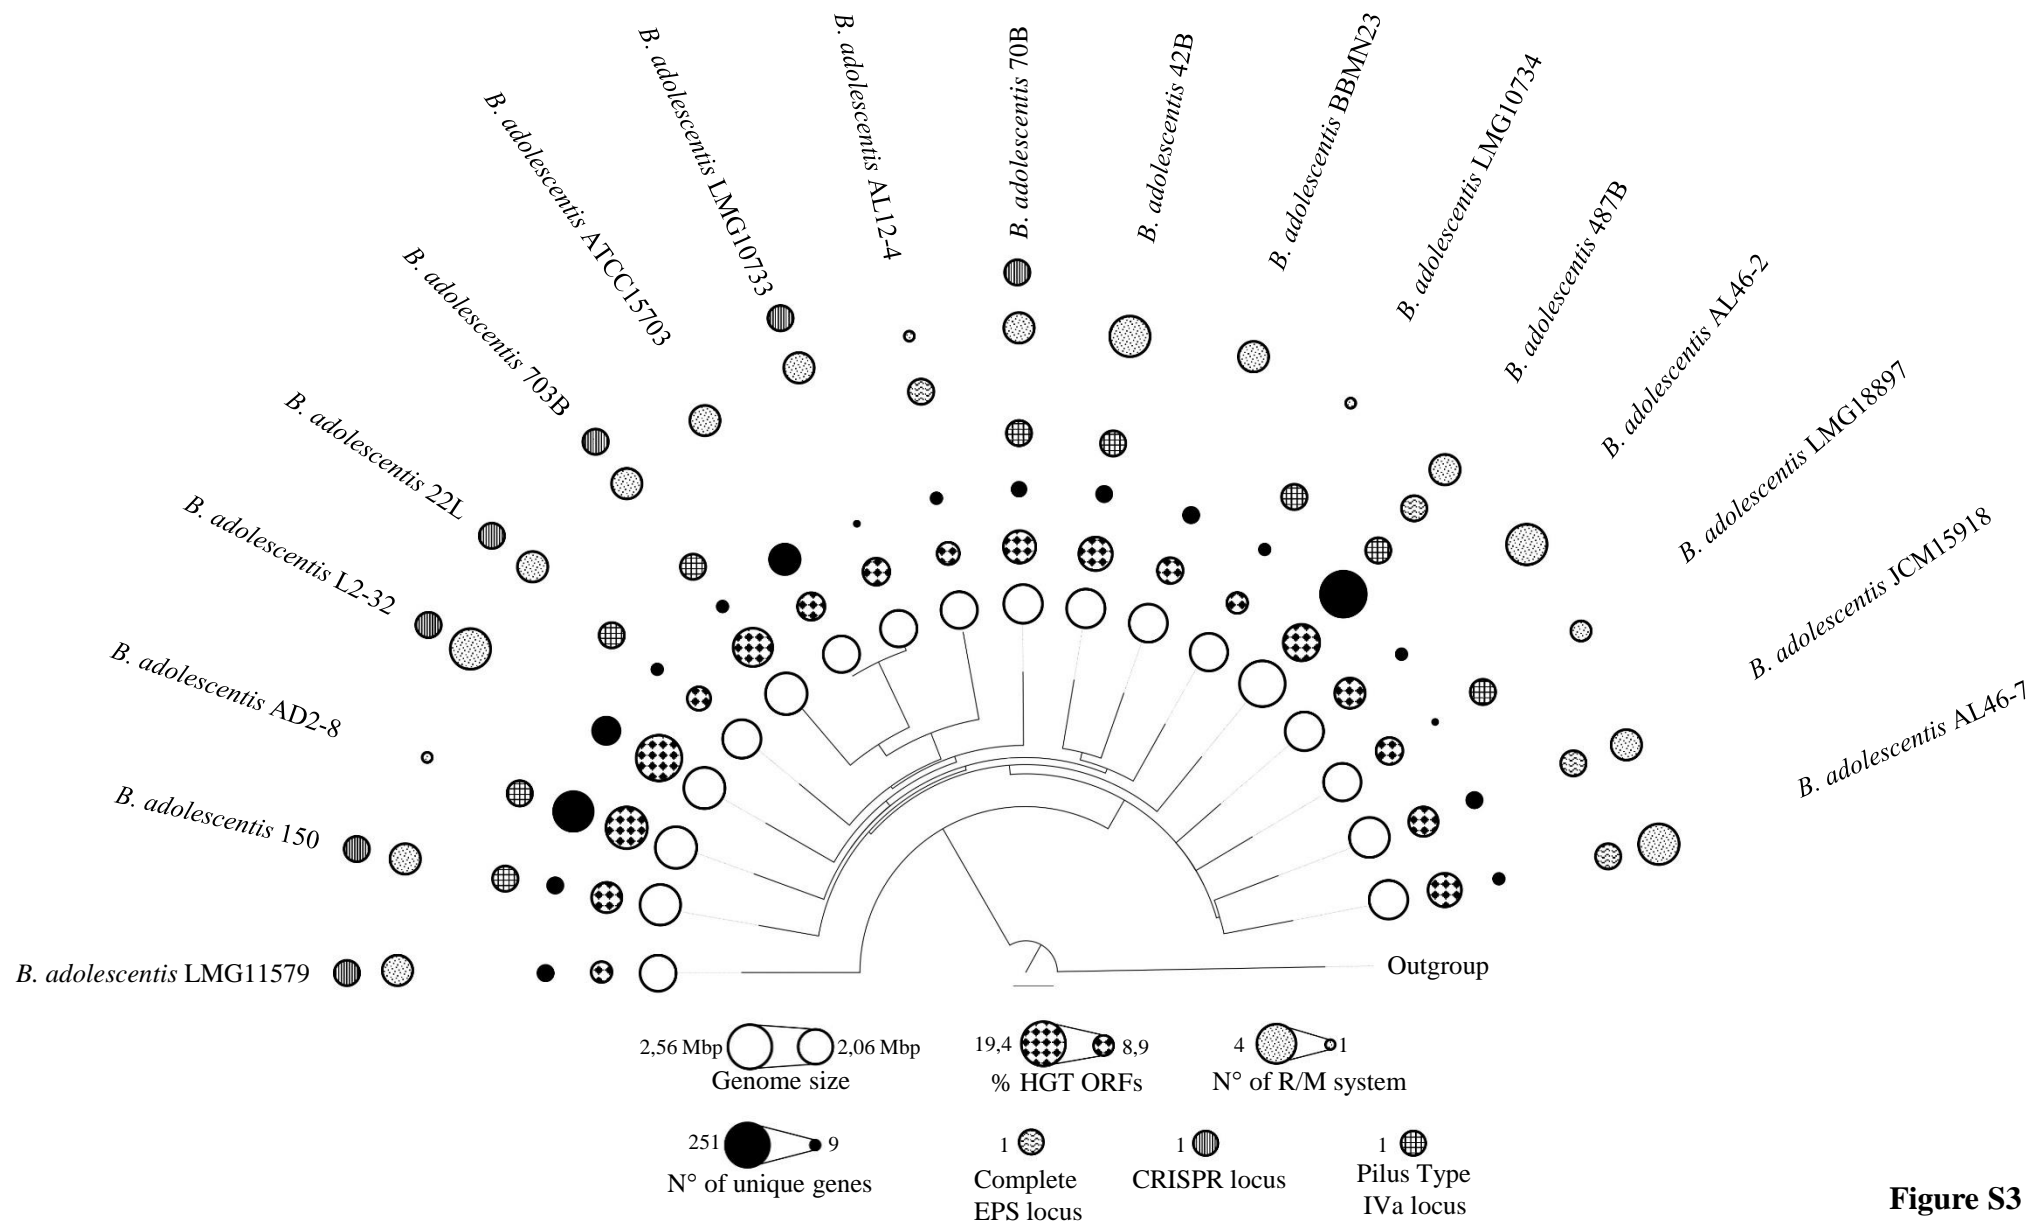

**Figure S3**

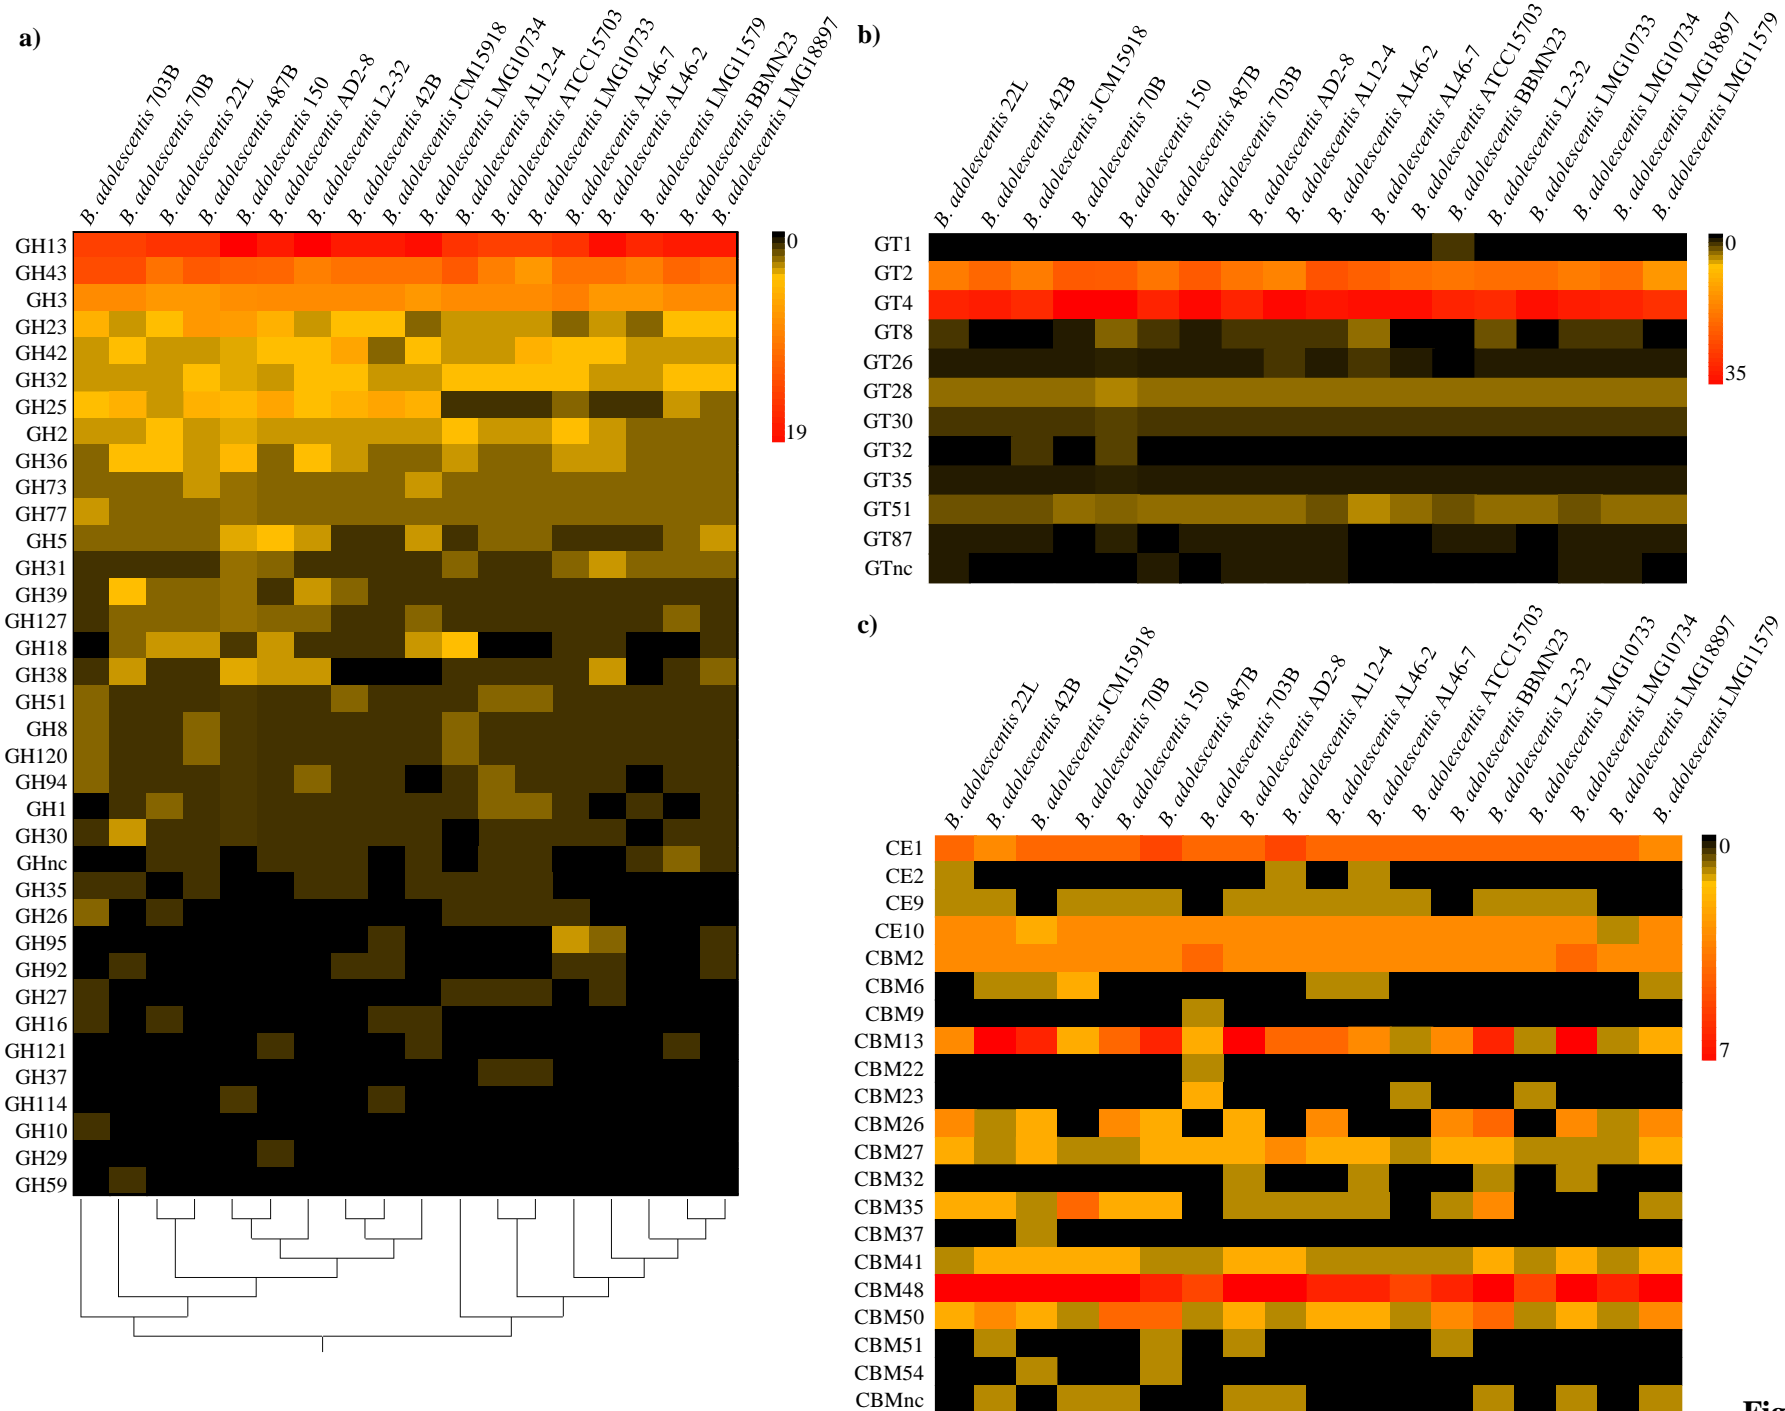

**Figure S4**

1 **Table S1** Average nucleotide identity (ANI) alignment of *B. adolescentis* strains.

|                                  | <i>B. adolescentis</i> 487B | <i>B. adolescentis</i> AD2-8 | <i>B. adolescentis</i> 22L | <i>B. adolescentis</i> JCM15918 | <i>B. adolescentis</i> LMG18897 | <i>B. adolescentis</i> BBM23 | <i>B. adolescentis</i> L2-32 | <i>B. adolescentis</i> LMG11579 | <i>B. adolescentis</i> ATCC15703 | <i>B. adolescentis</i> 150 | <i>B. adolescentis</i> 70B | <i>B. adolescentis</i> 703B | <i>B. adolescentis</i> LMG10734 | <i>B. adolescentis</i> LMG10733 | <i>B. adolescentis</i> AL12-4 | <i>B. adolescentis</i> 42B | <i>B. adolescentis</i> AL46-2 | <i>B. adolescentis</i> AL46-7 |
|----------------------------------|-----------------------------|------------------------------|----------------------------|---------------------------------|---------------------------------|------------------------------|------------------------------|---------------------------------|----------------------------------|----------------------------|----------------------------|-----------------------------|---------------------------------|---------------------------------|-------------------------------|----------------------------|-------------------------------|-------------------------------|
| <i>B. adolescentis</i> 487B      | ---                         | 98,47                        | 98,68                      | 98,25                           | 98,52                           | 98,4                         | 98,27                        | 97,83                           | 98,17                            | 98,52                      | 98,45                      | 97,91                       | 98,59                           | 98,17                           | 98,31                         | 98,44                      | 98,29                         | 98,18                         |
| <i>B. adolescentis</i> AD2-8     | 98,45                       | ---                          | 98,62                      | 98,43                           | 98,4                            | 98,3                         | 98,44                        | 97,91                           | 98,23                            | 98,58                      | 98,41                      | 97,9                        | 98,73                           | 98,2                            | 98,23                         | 98,38                      | 98,37                         | 98,32                         |
| <i>B. adolescentis</i> 22L       | 98,65                       | 98,59                        | ---                        | 98,41                           | 98,5                            | 98,45                        | 98,47                        | 97,95                           | 98,29                            | 98,55                      | 98,43                      | 98,27                       | 98,51                           | 98,28                           | 98,36                         | 98,48                      | 98,39                         | 98,33                         |
| <i>B. adolescentis</i> JCM15918  | 98,22                       | 98,37                        | 98,41                      | ---                             | 98,6                            | 98,52                        | 98,14                        | 98,07                           | 98,05                            | 98,33                      | 98,31                      | 97,96                       | 98,49                           | 98,03                           | 98,08                         | 98,45                      | 98,42                         | 98,34                         |
| <i>B. adolescentis</i> LMG18897  | 98,5                        | 98,34                        | 98,51                      | 98,61                           | ---                             | 98,53                        | 98,51                        | 98,04                           | 98,04                            | 98,58                      | 98,32                      | 97,97                       | 98,5                            | 98,03                           | 98,11                         | 98,45                      | 98,63                         | 98,5                          |
| <i>B. adolescentis</i> BBM23     | 98,37                       | 98,26                        | 98,45                      | 98,52                           | 98,52                           | ---                          | 98,35                        | 98,01                           | 97,99                            | 98,48                      | 98,37                      | 97,99                       | 98,4                            | 97,99                           | 98,07                         | 98,4                       | 98,35                         | 98,39                         |
| <i>B. adolescentis</i> L2-32     | 98,29                       | 98,44                        | 98,47                      | 98,17                           | 98,51                           | 98,37                        | ---                          | 97,9                            | 98,15                            | 98,44                      | 98,47                      | 98,03                       | 98,55                           | 98,15                           | 98,11                         | 98,56                      | 98,36                         | 98,33                         |
| <i>B. adolescentis</i> LMG11579  | 97,83                       | 97,85                        | 97,95                      | 98,08                           | 98,04                           | 98,02                        | 97,89                        | ---                             | 97,91                            | 97,96                      | 97,89                      | 97,89                       | 97,97                           | 97,88                           | 97,84                         | 97,77                      | 98,01                         | 98,05                         |
| <i>B. adolescentis</i> ATCC15703 | 98,13                       | 98,17                        | 98,29                      | 98,05                           | 98,04                           | 97,99                        | 98,13                        | 97,91                           | ---                              | 98,12                      | 98,23                      | 98,67                       | 98,28                           | 99,93                           | 98,48                         | 97,99                      | 97,92                         | 98,03                         |
| <i>B. adolescentis</i> 150       | 98,53                       | 98,56                        | 98,57                      | 98,36                           | 98,58                           | 98,49                        | 98,45                        | 97,96                           | 98,14                            | ---                        | 98,42                      | 98                          | 98,53                           | 98,11                           | 98,15                         | 98,36                      | 98,49                         | 98,42                         |
| <i>B. adolescentis</i> 70B       | 98,44                       | 98,39                        | 98,47                      | 98,38                           | 98,37                           | 98,42                        | 98,48                        | 97,93                           | 98,28                            | 98,46                      | ---                        | 98,26                       | 98,51                           | 98,27                           | 98,27                         | 98,43                      | 98,26                         | 98,39                         |
| <i>B. adolescentis</i> 703B      | 97,93                       | 97,89                        | 98,3                       | 97,98                           | 98,01                           | 98,02                        | 98,01                        | 97,92                           | 98,7                             | 97,99                      | 98,24                      | ---                         | 98,16                           | 98,68                           | 98,42                         | 98                         | 97,86                         | 97,91                         |
| <i>B. adolescentis</i> LMG10734  | 98,58                       | 98,72                        | 98,53                      | 98,54                           | 98,53                           | 98,41                        | 98,55                        | 98                              | 98,29                            | 98,55                      | 98,47                      | 98,16                       | ---                             | 98,26                           | 98,24                         | 98,6                       | 98,37                         | 98,29                         |
| <i>B. adolescentis</i> LMG10733  | 98,13                       | 98,16                        | 98,3                       | 98,05                           | 98,03                           | 97,99                        | 98,14                        | 97,89                           | 99,93                            | 98,11                      | 98,23                      | 98,67                       | 98,27                           | ---                             | 98,47                         | 97,98                      | 97,91                         | 98,01                         |
| <i>B. adolescentis</i> AL12-4    | 98,3                        | 98,21                        | 98,37                      | 98,1                            | 98,13                           | 98,09                        | 98,12                        | 97,87                           | 98,49                            | 98,15                      | 98,27                      | 98,42                       | 98,25                           | 98,48                           | ---                           | 98,16                      | 98,02                         | 98,06                         |
| <i>B. adolescentis</i> 42B       | 98,44                       | 98,42                        | 98,53                      | 98,5                            | 98,45                           | 98,42                        | 98,56                        | 97,8                            | 98,06                            | 98,39                      | 98,45                      | 98,04                       | 98,61                           | 98,03                           | 98,15                         | ---                        | 98,36                         | 98,29                         |
| <i>B. adolescentis</i> AL46-2    | 98,31                       | 98,38                        | 98,41                      | 98,48                           | 98,67                           | 98,37                        | 98,37                        | 98,02                           | 97,94                            | 98,49                      | 98,26                      | 97,88                       | 98,39                           | 97,93                           | 98,04                         | 98,39                      | ---                           | 98,69                         |
| <i>B. adolescentis</i> AL46-7    | 98,18                       | 98,33                        | 98,34                      | 98,37                           | 98,51                           | 98,41                        | 98,33                        | 98,05                           | 98,04                            | 98,42                      | 98,37                      | 97,91                       | 98,3                            | 98,01                           | 98,05                         | 98,28                      | 98,68                         | ---                           |



1 **Table S2** Percentage of genes putatively involved in HGT events.

2

|                                  | % ORFs  |
|----------------------------------|---------|
| <i>B. adolescentis</i> 22L       | 20.93%  |
| <i>B. adolescentis</i> 42B       | 8.68%   |
| <i>B. adolescentis</i> 45T       | 24.27%  |
| <i>B. adolescentis</i> 70B       | 41.99%  |
| <i>B. adolescentis</i> 150       | 17.39%  |
| <i>B. adolescentis</i> 487       | 33.72%  |
| <i>B. adolescentis</i> 703B      | 25.51%  |
| <i>B. adolescentis</i> AD2-8     | 41.99%  |
| <i>B. adolescentis</i> AL12-4    | 22.50%  |
| <i>B. adolescentis</i> AL46-2    | 16.09%  |
| <i>B. adolescentis</i> AL46-7    | 11.11%  |
| <i>B. adolescentis</i> ATCC15703 | 3.09%   |
| <i>B. adolescentis</i> BBM23     | 25.65%  |
| <i>B. adolescentis</i> L2-32     | 33.60%  |
| <i>B. adolescentis</i> LMG10733  | 4.17%   |
| <i>B. adolescentis</i> LMG10734  | 15.65%  |
| <i>B. adolescentis</i> LMG11579  | 25.87 % |
| <i>B. adolescentis</i> LMG18897  | 32.84%  |
